# Supplementary material
Source: publisher site journal article supplement (https://www.dovepress.com/get_supplementary_file.php?f=321367.docx)
Supplement: Supplementary file 1 [file get_supplementary_file.php]

**Supplementary Table 1** Relationship between SF-MPQ-2 and postnatal anxiety, and postnatal depressive disorders respectively.

| **Parameters (Outcome: Postnatal anxiety disorders)** | **Unadjusted OR (95% CI)** | **P-value** |
| --- | --- | --- |
| SF-MPQ-2 Continuous pain subscale | 0.96 (0.79, 1.17) | 0.6965 |
| SF-MPQ-2 Intermittent pain subscale | 1.05 (0.87, 1.26) | 0.6361 |
| SF-MPQ-2 Neuropathic pain subscale | 1.25 (0.97, 1.61) | 0.0838 |
| SF-MPQ-2 Affective descriptors subscale | 1.08 (0.88, 1.32) | 0.4753 |
| SF-MPQ-2 total | 1.08 (0.85, 1.37) | 0.5303 |
|  |  |  |
| **Parameters (Outcome: Postnatal depressive disorders)** | **Unadjusted OR (95% CI)** | **P-value** |
| SF-MPQ-2 Continuous pain subscale | 1.08 (0.89, 1.31) | 0.4388 |
| SF-MPQ-2 Intermittent pain subscale | 1.14 (0.95, 1.38) | 0.1636 |
| SF-MPQ-2 Neuropathic pain subscale | 1.24 (0.96, 1.60) | 0.1079 |
| SF-MPQ-2 Affective descriptors subscale | 1.14 (0.93, 1.41) | 0.2026 |
| SF-MPQ-2 total | 1.19 (0.94, 1.51) | 0.1562 |

**Abbreviation:** CI, confidence interval; OR, Odds ratio;SF-MPQ-2, Short-form-McGill Pain Questionnaire-2
